# Supplementary material for: Thermosynechococcus switches the direction of phototaxis by a c-di-GMP-dependent process with high spatial resolution
Source: eLife. 2022 May 10;11:e73405. doi: 10.7554/eLife.73405 (PMC9090330; doi:10.7554/eLife.73405)
Supplement: Figure 1—source data 1. [file elife-73405-fig1-data1.xlsx]

## Sheet: Sheet1
	Dark	20	500
Angle	Counts	Counts	Counts
-180	3	2	23
-150	4	1	13
-120	2	2	2
-90	2	1	0
-60	5	5	0
-30	1	10	0
0	1	13	0
30	2	7	0
60	1	2	0
90	3	2	0
120	4	2	0
150	5	0	11
