# Supplementary material for: Thermosynechococcus switches the direction of phototaxis by a c-di-GMP-dependent process with high spatial resolution
Source: eLife. 2022 May 10;11:e73405. doi: 10.7554/eLife.73405 (PMC9090330; doi:10.7554/eLife.73405)
Supplement: Figure 1—source data 2. [file elife-73405-fig1-data2.xlsx]

## Sheet: Sheet1
	Histograms				Low data of cell displacement (μm/min)
	Dark	20	500		Dark	20	500
	Counts	Counts	Counts		Displacement	Displacement	Displacement
-90	0	0	0		-3.90864	32.7518	-58.3351
-75	0	0	3		-2.78186	62.6662	-49.922
-60	0	2	24		-18.0371	23.3462	-63.8951
-45	0	1	10		-8.03657	-41.0182	-58.4298
-30	4	5	7		8.47942	9.5561	-41.3186
-15	27	8	6		7.56152	-10.4295	-29.9107
0	16	7	0		-0.65632	40.0054	-57.9208
15	3	14	0		-0.0391448	3.52942	-61.6359
30	0	10	0		-5.61396	53.6289	-38.7505
45	0	2	0		-11.1111	49.9152	-22.2012
60	0	1	0		8.39419	-43.5211	-54.8169
75	0	0	0		4.89934	-6.33759	-52.3098
90	0	0	0		-8.65931	30.6971	-24.9913
105	0	0	0		2.76989	48.0398	-45.4495
					-6.48409	6.65136	-33.0765
					-1.83726	5.04634	-57.7314
					-6.56009	23.9372	-52.1255
					-14.9733	-2.43393	-32.7124
					17.2587	59.4468	-54.2602
					3.2627	10.34	-43.8303
					-4.88219	-8.74042	-51.1365
					7.92867	42.6758	-1.57945
					0.290978	16.59	-4.2432
					-13.4852	36.3942	-13.0771
					-2.97797	57.1893	-23.5
					-10.1544	7.32072	-8.77172
					-2.53273	32.1945	-58.1479
					-4.32736	32.7422	-58.9814
					-0.0600416	52.6111	-11.5915
					-0.268247	40.2197	-50.996
					15.6357	31.75	-67.6602
					-4.56293	79	-46.9891
					19.9986	27.0153	-49.7538
					-15.185	10.9014	-56.8888
					-3.91715	47.3621	-41.2946
					0.772231	33.0258	-47.6538
					-0.0180664	54.734	-57.1084
					0.0289308	42.6807	-23.817
					0.0234107	-16.136	-50.5149
					-15.233	72.1797	-58.7935
					-20.52	5.57409	-37.3068
					-11.8478	35.8964	-14.9667
					-6.27907	30.2421	-45.9154
					2.56619	36.6731	-48.9972
					-4.44116	56.6643	-44.3698
					5.51599	21.8534	-24.6907
					-10.3409	-5.91231	-26.1556
					6.56086	23.4619	-30.4913
					9.47302	24.8238	-58.2807
					0.229158	50.3297	-39.4668
