# Supplementary material for: Thermosynechococcus switches the direction of phototaxis by a c-di-GMP-dependent process with high spatial resolution
Source: eLife. 2022 May 10;11:e73405. doi: 10.7554/eLife.73405 (PMC9090330; doi:10.7554/eLife.73405)
Supplement: Figure 2—source data 1. [file elife-73405-fig2-data1.xlsx]

## Sheet: Sheet1
	monochromatic								Histograms							Low data of cell displacement (μm/min)								dichromatic										Histograms								Low data of cell displacement (μm/min)
	Dark	Blue	Teal	Green	Red	Far Red		Displacement	monochromatic							monochromatic								Dark	Blue + Green	Teal + Green	Green + Red	Green + Far Red	Blue + Red	Blue + Far Red	Red + Far Red		Displacement	dichromatic								dichromatic
Average (μm/min)	-2	0	20	31	4	2		(μm/min)	Dark	Blue	Teal	Green	Red	Far Red		Dark	Blue	Teal	Green	Red	Far Red		Average (μm/min)	-2	-29	25	25	-8	2	-6	4		(μm/min)	Blue + Green	Teal + Green	Green + Red	Green + Far Red	Blue + Red	Blue + Far Red	Red + Far Red		Blue + Green	Teal + Green	Green + Red	Green + Far Red	Blue + Red	Blue + Far Red	Red + Far Red
SD	9	19	19	23	23	11		-90	0	0	0	0	0	0		-3.90864	-35.9968	55.1043	33.7524	-71.0623	-1.24571		SD	9	20	23	21	21	13	19	22		-90	1	0	0	0	0	0	0		-44.5911	44.1504	20.7039	-4.08069	10.684	-36.7015	34.1932
								-75	0	0	0	0	1	0		-2.78186	-5.1575	8.00639	42.8535	8.22521	-12.4959												-75	1	0	0	0	0	0	0		-31.5299	31.3635	2.48983	-39.1279	17.2841	7.47279	-0.00293
								-60	0	0	0	0	1	0		-18.0371	2.74692	19.5367	-4.85484	38.4121	22.2098												-60	8	0	0	1	1	1	0		-3.15227	23.1127	21.3258	-39.5986	-4.30253	4.01535	-1.70391
								-45	0	2	0	0	1	0		-8.03657	-10.5404	18.8599	29.7073	24.8609	3.65201												-45	17	0	0	9	0	6	5		-42.0395	46.1745	15.1208	-24.4845	-11.6632	-7.72022	26.6953
								-30	4	7	3	0	5	3		8.47942	-9.04398	23.4358	17.5783	-17.2632	1.87356												-30	12	2	1	12	2	8	4		-36.6937	23.0204	-23.6077	24.1003	-6.41395	15.5257	-24.4077
								-15	27	18	2	5	9	22		7.56152	12.0182	26.8664	50.9755	-2.97407	-2.62863												-15	7	5	5	11	14	12	14		-30.7991	36.483	-1.37517	24.852	8.69901	-30.8369	22.6867
								0	16	13	12	7	20	19		-0.65632	-8.82863	2.08979	-13.0289	1.21882	16.543												0	2	11	10	8	28	20	11		-34.9733	40.3907	7.74229	19.4518	-9.99071	3.43578	-31.0682
								15	3	7	21	9	9	6		-0.0391448	6.37268	16.2382	35.8851	17.5493	5.51789												15	2	11	13	7	4	1	9		-22.5901	15.2548	6.59443	-5.31027	-1.03343	-2.81007	35.5671
								30	0	2	7	16	2	0		-5.61396	2.83693	52.0884	45.2052	11.2417	1.38469												30	0	11	11	2	1	2	6		-47.4765	12.188	32.7308	-30.7089	7.14697	-2.71311	16.7761
								45	0	0	4	9	2	0		-11.1111	-31.8024	39.5028	19.5006	1.40054	10.657												45	0	6	8	0	0	0	1		15.2175	12.4884	38.7384	-41.3743	-16.5867	13.8878	-2.82302
								60	0	1	1	3	0	0		8.39419	34.5637	5.95221	6.02455	31.1997	3.53956												60	0	3	2	0	0	0	0		-40.6102	31.9201	31.2899	-0.626434	10.9727	10.8483	30.6121
								75	0	0	0	0	0	0		4.89934	-7.96075	11.1151	38.4587	4.04121	-1.9177												75	0	1	0	0	0	0	0		-39.1695	5.82829	52.2152	-21.4805	-48.461	-3.89143	7.20581
								90	0	0	0	1	0	0		-8.65931	15.0868	25.0112	30.394	7.03194	13.7156												90	0	0	0	0	0	0	0		-53.263	19.3217	18.4848	-17.3092	-17.2692	-15.3697	35.4292
								105	0	0	0	0	0	0		2.76989	-6.65469	9.4877	31.2852	57.4281	5.9638												105	0	0	0	0	0	0	0		1.71071	2.10479	41.4912	-21.8069	8.59506	-24.3813	-44.7159
																-6.48409	5.59087	12.2666	100.658	-30.6923	-13.0222																					-10.6535	31.0961	65.7184	3.64808	7.72313	-23.6617	-12.9519
																-1.83726	-27.6001	13.9374	24.5909	-5.28519	6.58849																					-45.0073	49.3268	12.3839	-7.38482	4.8754	38.4478	-35.7539
																-6.56009	-8.17789	-18.6013	71.3256	3.17395	-3.28254																					-82.7689	29.6718	23.8418	15.9833	1.77007	-31.5533	10.114
																-14.9733	-13.8691	39.6875	53.8276	2.56059	-5.21415																					-49.591	27.0831	12.8917	0.87648	6.3101	-35.062	-32.8986
																17.2587	13.8743	18.5014	47.8556	19.6743	-2.07452																					-41.2747	36.5731	54.638	16.9074	11.9349	0.463743	-7.25653
																3.2627	-14.5886	24.744	53.3813	6.31404	5.81793																					2.95297	-7.02154	22.5231	18.3378	0.721952	-15.9672	-6.31747
																-4.88219	22.2692	19.1517	26.0267	-23.5378	-12.569																					-47.4312	37.6175	10.0886	29.2802	3.64284	-5.59677	47.4763
																7.92867	0.410607	45.3414	39.3766	-0.0559806	-2.67456																					-62.123	10.9318	43.3208	0.651134	26.8858	0.235947	-1.08397
																0.290978	5.8987	16.306	7.92713	-8.71213	-20.7467																					-11.4677	58.7419	22.0512	-7.78067	2.20242	-54.7621	1.93778
																-13.4852	13.8434	20.8503	30.3074	3.60372	-25.2877																					-31.5212	-28.2564	42.3069	-35.5827	1.42612	0.315268	-9.80571
																-2.97797	-0.0645021	28.6862	37.3322	-21.1194	-1.48235																					-15.0333	61.3005	37.4278	-30.1905	-2.00411	8.41549	-2.87204
																-10.1544	-6.46674	8.82216	39.2643	12.445	1.89937																					-13.9536	1.46297	16.7186	-20.4875	12.5216	-23.5911	7.61316
																-2.53273	-5.95474	25.7861	37.4349	-52.1611	24.318																					-21.8347	11.0541	46.9445	-2.16766	-1.72378	14.6705	9.20571
																-4.32736	9.24079	-16.2223	23.8589	-3.21409	12.088																					-38.4206	77.7657	34.9362	4.94132	-2.40059	7.37006	23.4664
																-0.0600416	-20.9426	14.5222	54.03	-24.7594	13.8732																					-30.7571	52.4355	37.8415	-34.0768	-14.4694	-28.7075	17.1417
																-0.268247	-14.9039	62.0546	5.30687	-3.2347	-8.25242																					24.4489	24.7526	11.4349	11.2475	11.566	-17.3194	-6.20685
																15.6357	65.0344	41.1279	39.2213	10.0351	-0.499266																					-24.3683	28.1692	40.1276	-17.5134	2.37604	-28.0975	17.3397
																-4.56293	-0.364258	33.3466	56.2183	1.52466	-6.47067																					-52.4625	38.2362	22.7982	-15.3258	0.0178144	-42.9747	-15.8423
																19.9986	-26.9881	38.0823	44.0889	19.9792	-12.9474																					-33.0385	-7.67899	12.919	-50.3633	5.47928	32.7804	42.2078
																-15.185	-3.69379	5.98837	62.3144	27.9955	14.0981																					-24.2209	28.2865	8.28909	-15.3596	7.3593	2.77295	-3.00067
																-3.91715	1.03404	15.1955	40.5378	-8.3706	0.216351																					-40.9954	-6.51931	-13.3347	-34.0383	-5.21912	-10.7326	-38.7405
																0.772231	-18.7066	-5.21552	45.9308	3.49356	28.8516																					-26.3477	7.5444	53.1855	10.7367	8.35105	0.969473	2.32404
																-0.0180664	-15.6456	16.4767	-11.7234	18.0166	15.8985																					-36.5029	4.94831	7.15236	38.8016	21.638	-12.8123	-25.1869
																0.0289308	-11.624	33.81	2.08845	17.3557	18.5784																					-19.3718	66.9239	16.0748	-1.46175	3.46056	6.50576	9.94501
																0.0234107	19.8102	1.8219	1.08305	59.5828	-7.98598																					-9.65892	29.721	24.4992	5.50776	23.8999	4.95272	-3.50425
																-15.233	32.6549	43.2924	-5.94854	12.0983	-2.20307																					-10.2006	62.2693	30.1765	8.57922	-3.17597	-2.91523	2.16858
																-20.52	5.9187	11.5107	25.4354	12.3836	-0.0321421																					-46.4478	-2.11063	52.3965	-34.1574	1.46758	2.87814	-23.2491
																-11.8478	-25.6219	24.3437	0.147432	13.588	-9.40063																					-17.8015	56.0178	61.491	-13.7665	-5.9562	-36.0258	17.7791
																-6.27907	16.0706	18.4759	-2.52107	17.2794	-3.34237																					-31.1226	6.27117	46.8352	-16.37	0.580081	3.66156	6.47434
																2.56619	1.69588	17.6035	43.0371	6.12291	13.7743																					-25.8659	-3.48195	16.7601	-3.15473	-7.29344	0.341779	10.2449
																-4.44116	-4.40143	-8.56117	22.2863	-7.22597	6.55166																					-4.3796	-15.8618	55.9918	-19.7028	33.0078	-5.47699	38.8096
																5.51599	-10.2868	20.0268	25.0832	-6.02435	7.40955																					-20.5579	37.4189	-8.99059	-28.1081	4.01331	-11.2832	12.3144
																-10.3409	25.885	28.3689	7.28316	12.9681	-18.8346																					-54.0861	8.87268	46.1628	-11.1028	-4.08527	-1.59391	15.541
																6.56086	19.1895	54.9232	43.8474	11.8073	3.72828																					-19.9556	39.4222	-9.2254	-7.99122	13.572	3.58138	15.1533
																9.47302	-19.9996	-26.9536	67.3091	24.5081	-1.68319																					-29.9619	49.3449	17.2133	36.1786	0.773221	4.59104	-1.99789
																0.229158	20.6416	29.4868	49.0623	-19.6958	-1.73753																					-38.5626	22.9354	-5.02694	-18.5687	5.55411	-0.526462	-5.17276
[truncated: 54 more columns]
