# Supplementary material for: Thermosynechococcus switches the direction of phototaxis by a c-di-GMP-dependent process with high spatial resolution
Source: eLife. 2022 May 10;11:e73405. doi: 10.7554/eLife.73405 (PMC9090330; doi:10.7554/eLife.73405)
Supplement: Figure 2—source data 2. [file elife-73405-fig2-data2.xlsx]

## Sheet: Sheet1
	monochromatic																	Green (μmol/m2 s)						Temperature (degree)						Green 70 + Blue X (μmol/m2 s)							Green Right
Angle	Dark	Blue	Teal	Green	Red	Far Red		Angle	Blue + Green	Teal + Green	Green + Red	Green + Far Red	Blue + Red	Blue + Far Red	Red + Far Red		Angle	2	20	70	700		Angle	25	35	45	55		Angle	2	20	70	200	2000		Angle	Blue Left
-180	3	6	0	0	1	2		-180	21	0	0	0	3	8	4		-180	2	1	0	2		-180	0	14	0	1		-180	0	4	21	22	10		-180	12
-150	4	4	2	0	2	5		-150	4	2	2	0	2	3	3		-150	1	0	0	3		-150	0	10	0	3		-150	0	5	4	2	5		-150	8
-120	2	6	0	0	3	1		-120	4	1	0	0	1	2	4		-120	6	1	0	2		-120	0	1	0	6		-120	1	3	4	4	2		-120	1
-90	2	4	2	2	3	2		-90	1	2	2	2	3	3	2		-90	1	1	2	1		-90	2	1	2	2		-90	1	2	1	2	1		-90	2
-60	5	3	6	5	8	4		-60	1	5	6	5	4	0	6		-60	7	2	5	5		-60	5	0	5	2		-60	6	6	1	0	0		-60	0
-30	1	7	14	7	3	5		-30	0	11	14	7	4	1	8		-30	5	7	7	7		-30	7	0	7	11		-30	11	5	0	1	0		-30	0
0	1	3	11	14	2	4		0	1	18	11	14	5	2	3		0	2	16	14	12		0	14	1	14	3		0	14	6	1	0	2		0	0
30	2	2	8	7	9	4		30	0	4	8	7	4	4	3		30	8	8	7	8		30	7	0	7	3		30	8	5	0	0	0		30	2
60	1	1	3	1	4	2		60	1	2	3	1	1	5	4		60	2	5	1	3		60	1	0	1	3		60	1	4	1	1	0		60	0
90	3	0	1	0	5	3		90	0	1	1	0	2	4	5		90	3	4	0	2		90	0	3	0	1		90	1	1	0	0	4		90	2
120	4	2	2	0	1	3		120	2	1	2	0	1	2	3		120	2	0	0	1		120	0	3	0	3		120	1	1	2	3	12		120	7
150	5	6	0	0	4	1		150	13	10	0	0	3	4	1		150	1	0	0	1		150	0	14	0	1		150	0	1	13	13	10		150	16
