# Supplementary material for: Thermosynechococcus switches the direction of phototaxis by a c-di-GMP-dependent process with high spatial resolution
Source: eLife. 2022 May 10;11:e73405. doi: 10.7554/eLife.73405 (PMC9090330; doi:10.7554/eLife.73405)
Supplement: Figure 3—source data 1. [file elife-73405-fig3-data1.xlsx]

## Sheet: Sheet1
	Green									Green + Blue
	WT	sesA	sesB	sesC	cikA	pixD	LOV	OCP		WT	sesA	sesB	sesC	cikA	pixD	LOV	OCP
Average (μm/min)	31	32	19	20	24	27	35	34		-29	18	-41	-40	-27	-28	-34	-30
SD	19	18	26	20	13	14	12	16		21	19	24	27	17	20	17	24
