# Supplementary material for: Thermosynechococcus switches the direction of phototaxis by a c-di-GMP-dependent process with high spatial resolution
Source: eLife. 2022 May 10;11:e73405. doi: 10.7554/eLife.73405 (PMC9090330; doi:10.7554/eLife.73405)
Supplement: Figure 3—source data 2. [file elife-73405-fig3-data2.xlsx]

## Sheet: Sheet1
	2 min, Green 70 μmol/m2 s					6 min, Blue 70 + Green 70 μmol/m2 s					10 min, Green 70 μmol/m2 s
Angle	WT	sesA	sesB	sesC		WT	sesA	sesB	sesC		WT	sesA	sesB	sesC
-180	0	1	2	0		9	0	24	14		0	0	5	11
-150	0	0	1	0		9	1	5	4		0	1	4	9
-120	0	0	2	0		1	1	0	2		0	0	2	3
-90	1	2	2	1		1	0	0	0		0	1	3	0
-60	5	3	7	3		0	8	0	1		3	6	3	1
-30	16	16	4	10		0	8	0	1		20	21	7	0
0	16	17	10	8		0	17	0	0		15	11	10	0
30	5	7	4	9		0	7	0	0		4	8	2	1
60	2	1	3	6		1	1	0	0		1	1	3	1
90	0	0	3	1		1	0	1	1		0	0	1	1
120	0	0	2	3		8	0	5	6		0	0	0	4
150	0	1	1	0		12	1	13	18		0	0	1	17
