# Supplementary material for: Thermosynechococcus switches the direction of phototaxis by a c-di-GMP-dependent process with high spatial resolution
Source: eLife. 2022 May 10;11:e73405. doi: 10.7554/eLife.73405 (PMC9090330; doi:10.7554/eLife.73405)
Supplement: Figure 3—source data 3. [file elife-73405-fig3-data3.xlsx]

## Sheet: Calculation
			cdG (nM)	cdG (pmol)	Cell density(OD750)	Cell vol. (ml)	cdG (pmol/OD/ml)	measured protein conc. (mg/ml)	Mean meas. prot. (mg/ml)	Protein (mg)	cdG (nmol/mg protein)	cdG (pmol/mg protein)
Wildtype#1	extracted on 5.2.20	Blue light_30min	44.3	8.86	1.01	3	2.92409	4.027	4.1815	0.41815	0.0211886	21.1886
Wildtype#1	extracted on 5.2.20	Blue light_30min	56.6	11.32	1.01	3	3.73597	4.336			0.0270716	27.0716
Wildtype#1	extracted on 5.2.20	Green light_30min	10.2	2.04	1.01	3	0.673267	5.063	4.6285	0.46285	0.00440748	4.40748
Wildtype#1	extracted on 5.2.20	Green light_30min	9.82	1.964	1.01	3	0.648185	4.194			0.00424328	4.24328
Wildtype#1	extracted on 5.2.20	Red light_30min	12.2	2.44	1.01	3	0.805281	4.186	4.391	0.4391	0.00555682	5.55682
Wildtype#1	extracted on 5.2.20	Red light_30min	14.1	2.82	1.01	3	0.930693	4.596			0.00642223	6.42223
Wildtype#1	extracted on 5.2.20	White light_30min	12.7	2.54	1.01	3	0.838284	4.59	4.849	0.4849	0.00523819	5.23819
Wildtype#1	extracted on 5.2.20	White light_30min	14.4	2.88	1.01	3	0.950495	5.108			0.00593937	5.93937
Wildtype#2	extracted on 4.2.20	Blue light_30min	39.2	7.84	0.74	3	3.53153	3.502	3.8115	0.38115	0.0205693	20.5693
Wildtype#2	extracted on 4.2.20	Blue light_30min	32.6	6.52	0.74	3	2.93694	4.121			0.0171061	17.1061
Wildtype#2	extracted on 4.2.20	Green light_30min	9.45	1.89	0.74	3	0.851351	4	3.9575	0.39575	0.00477574	4.77574
Wildtype#2	extracted on 4.2.20	Green light_30min	8.35	1.67	0.74	3	0.752252	3.915			0.00421984	4.21984
Wildtype#2	extracted on 4.2.20	Red light_30min	12.7	2.54	0.74	3	1.14414	4.338	3.639	0.3639	0.00697994	6.97994
Wildtype#2	extracted on 4.2.20	Red light_30min	14.4	2.88	0.74	3	1.2973	2.94			0.00791426	7.91426
Wildtype#2	extracted on 4.2.20	White light_30min	15.6	3.12	0.74	3	1.40541	3.56	3.702	0.3702	0.00842788	8.42788
Wildtype#2	extracted on 4.2.20	White light_30min	14.1	2.82	0.74	3	1.27027	3.844			0.0076175	7.6175
Wildtype#3	extracted on 6.2.20	Blue light_30min	45.4	9.08	0.8	3	3.78333	3.38	3.3835	0.33835	0.0268361	26.8361
Wildtype#3	extracted on 6.2.20	Blue light_30min	42.1	8.42	0.8	3	3.50833	3.387			0.0248855	24.8855
Wildtype#3	extracted on 6.2.20	Green light_30min	11.6	2.32	0.8	3	0.966667	3.612	3.389	0.3389	0.00684568	6.84568
Wildtype#3	extracted on 6.2.20	Green light_30min	9.57	1.914	0.8	3	0.7975	3.166			0.00564768	5.64768
Wildtype#3	extracted on 6.2.20	Red light_30min	12.8	2.56	0.8	3	1.06667	3.625	3.7915	0.37915	0.00675195	6.75195
Wildtype#3	extracted on 6.2.20	Red light_30min	14.2	2.84	0.8	3	1.18333	3.958			0.00749044	7.49044
Wildtype#3	extracted on 6.2.20	White light_30min	13.2	2.64	0.8	3	1.1	3.254	3.348	0.3348	0.0078853	7.8853
Wildtype#3	extracted on 6.2.20	White light_30min	15.4	3.08	0.8	3	1.28333	3.442			0.00919952	9.19952
∆sesA#1	extracted on 4.2.20	Blue light_30min	11.3	2.26	0.75	3	1.00444	2.254	2.1795	0.21795	0.0103694	10.3694
∆sesA#1	extracted on 4.2.20	Blue light_30min	12	2.4	0.75	3	1.06667	2.105			0.0110117	11.0117
∆sesA#1	extracted on 4.2.20	Green light_30min	10.5	2.1	0.75	3	0.933333	2.852	2.7615	0.27615	0.00760456	7.60456
∆sesA#1	extracted on 4.2.20	Green light_30min	9.78	1.956	0.75	3	0.869333	2.671			0.00708311	7.08311
∆sesA#4	extracted on 10.2.20	Blue light_30min	15.1	3.02	0.66	3	1.52525	1.963	2.1795	0.21795	0.0138564	13.8564
∆sesA#4	extracted on 10.2.20	Blue light_30min	9.78	1.956	0.66	3	0.987879	2.396			0.00897454	8.97454
∆sesA#4	extracted on 10.2.20	Green light_30min	10.5	2.1	0.66	3	1.06061	2.206	2.08	0.208	0.0100962	10.0962
∆sesA#4	extracted on 10.2.20	Green light_30min	9.97	1.994	0.66	3	1.00707	1.954			0.00958654	9.58654
∆sesA#5	extracted on 6.2.20	Blue light_30min	12.2	2.44	0.69	3	1.17874	2.576	2.554	0.2554	0.00955364	9.55364
∆sesA#5	extracted on 6.2.20	Blue light_30min	15.3	3.06	0.69	3	1.47826	2.532			0.0119812	11.9812
∆sesA#5	extracted on 6.2.20	Green light_30min	12.7	2.54	0.69	3	1.22705	2.52	2.238	0.2238	0.0113494	11.3494
∆sesA#5	extracted on 6.2.20	Green light_30min	13.6	2.72	0.69	3	1.31401	1.956			0.0121537	12.1537

## Sheet: For Dot Plot 2
cdG (pmol/mg protein)	WT_BL	WT_GL	WT_RL	WT_WL	∆sesA_BL	∆sesA_GL
	21.1886	4.40748	5.55682	5.23819	10.3694	7.60456
	27.0716	4.24328	6.42223	5.93937	11.0117	7.08311
	20.5693	4.77574	6.97994	8.42788	13.8564	10.0962
	17.1061	4.21984	7.91426	7.6175	8.97454	9.58654
	26.8361	6.84568	6.75195	7.8853	9.55364	11.3494
	24.8855	5.64768	7.49044	9.19952	11.9812	12.1537
