# Supplementary material for: Thermosynechococcus switches the direction of phototaxis by a c-di-GMP-dependent process with high spatial resolution
Source: eLife. 2022 May 10;11:e73405. doi: 10.7554/eLife.73405 (PMC9090330; doi:10.7554/eLife.73405)
Supplement: Figure 4—source data 1. [file elife-73405-fig4-data1.xlsx]

## Sheet: Calculation
Name	cdG (nM)	cdG (pmol)	Protein conc (mg/ml)	Mean meas. prot. (mg/ml)	protein in the analyte (mg)	cdG (pmol/mg protein)
Wildtype#1	12.7	2.54	4.59	4.849	0.4849	5.23819
Wildtype#1	14.4	2.88	5.108			5.93937
Wildtype#2	15.6	3.12	3.56	3.702	0.3702	8.42788
Wildtype#2	14.1	2.82	3.844			7.6175
Wildtype#3	13.2	2.64	3.254	3.348	0.3348	7.8853
Wildtype#3	15.4	3.08	3.442			9.19952
Wildtype_N#1	32.9	6.58	5.575	4.959	0.4959	13.2688
Wildtype_N#1	35	7	4.343			14.1157
Wildtype_N#2	31.6	6.32	3.438	2.967	0.2967	21.301
Wildtype_N#2	28.1	5.62	2.496			18.9417
Wildtype_N#3	29.4	5.88	3.656	3.582	0.3582	16.4154
Wildtype_N#3	17.5	3.5	3.508			9.77108
tll1859toN_TvP#1	27.2	5.44	4.116	3.762	0.3762	14.4604
tll1859toN_TvP#1	25.2	5.04	3.408			13.3971
tll1859toN_TvP#2	22.8	4.56	1.724	1.521	0.1521	29.9803
tll1859toN_TvP#2	20.5	4.1	1.318			26.956
tll1859toN_TvP#3	11.2	2.24	2.271	1.8235	0.18235	12.2841
tll1859toN_TvP#3	11	2.2	1.376			12.0647

## Sheet: For Dot Plot
cdG (pmol/mg protein)	WT	WT_N	tll1859toN_TvP
	5.23819	13.2688	14.4604
	5.93937	14.1157	13.3971
	8.42788	21.301	29.9803
	7.6175	18.9417	26.956
	7.8853	16.4154	12.2841
	9.19952	9.77108	12.0647
