# Supplementary material for: Thermosynechococcus switches the direction of phototaxis by a c-di-GMP-dependent process with high spatial resolution
Source: eLife. 2022 May 10;11:e73405. doi: 10.7554/eLife.73405 (PMC9090330; doi:10.7554/eLife.73405)
Supplement: Figure 4—source data 2. — vulcanus. [file elife-73405-fig4-data2.xlsx]

## Sheet: N strain only
Chromosome	Position	Reference	Altaernative	Quality score	Effect	Amino acid change	Impact	Gene name	Protein ID	Annotation
AP018202.2	84685	T	C	29061.8	missense_variant	Lys311Glu	MODERATE	NIES2134_100850	BAY52310.1	hypothetical protein
AP018202.2	85445	C	T	33612.8	synonymous_variant	Ala57Ala	LOW	NIES2134_100850	BAY52310.1	hypothetical protein
AP018202.2	180429	T	C	16306.8	missense_variant	Asn82Ser	MODERATE	NIES2134_101780	BAY52218.1	hypothetical protein
AP018202.2	182404	C	T	32558.8	missense_variant	Ala43Val	MODERATE	NIES2134_101800	BAY52216.1	hypothetical protein
AP018202.2	335401	G	A	32430.8	synonymous_variant	Pro357Pro	LOW	NIES2134_103270	BAY52071.1	hypothetical protein
AP018202.2	447169	T	C	29766.8	missense_variant	Lys369Arg	MODERATE	NIES2134_104370	BAY51965.1	putative transposase
AP018202.2	447688	G	C	23906.8	missense_variant	Thr196Arg	MODERATE	NIES2134_104370	BAY51965.1	putative transposase
AP018202.2	447813	C	T	28728.8	synonymous_variant	Val154Val	LOW	NIES2134_104370	BAY51965.1	putative transposase
AP018202.2	447912	T	A	41994.8	synonymous_variant	Gly121Gly	LOW	NIES2134_104370	BAY51965.1	putative transposase
AP018202.2	447933	G	A	29354.8	synonymous_variant	Ser114Ser	LOW	NIES2134_104370	BAY51965.1	putative transposase
AP018202.2	544252	G	A	28735.8	missense_variant	Pro85Ser	MODERATE	NIES2134_105410	BAY51864.1	putative transposase
AP018202.2	544572	A	G	3039.77	intergenic_region		MODIFIER	NIES2134_105410-NIES2134_105420	BAY51864.1	putative transposase
AP018202.2	544629	A	C	5999.77	synonymous_variant	Arg16Arg	LOW	NIES2134_105420	BAY51863.1	putative transposase
AP018202.2	544958	A	C	32945.8	missense_variant	Lys125Asn	MODERATE	NIES2134_105420	BAY51863.1	putative transposase
AP018202.2	565746	C	G	21565.8	missense_variant	Glu219Gln	MODERATE	NIES2134_105580	BAY51847.1	hypothetical protein
AP018202.2	567565	G	GCCTCCGCATACACCTCCCGATAAAACCGTGTCCGCTTCAGTTCCTCAGTGGTAAAC	8383.73	frameshift_variant	Thr199fs	HIGH	NIES2134_105600	BAY51845.1	hypothetical protein
AP018202.2	569034	G	T	15704.8	intergenic_region		MODIFIER	NIES2134_105610-NIES2134_105620
AP018202.2	569173	C	CT	34062.7	frameshift_variant	Gly259fs	HIGH	NIES2134_105620	BAY51843.1	hypothetical protein
AP018202.2	585802	T	G	30336.8	missense_variant	Lys227Gln	MODERATE	NIES2134_105780	BAY51827.1	putative transposase
AP018202.2	585893	C	T	32323.8	synonymous_variant	Thr196Thr	LOW	NIES2134_105780	BAY51827.1	putative transposase
AP018202.2	586099	C	G	51962.8	missense_variant	Glu128Gln	MODERATE	NIES2134_105780	BAY51827.1	putative transposase
AP018202.2	586118	T	C	51756.8	synonymous_variant	Gly121Gly	LOW	NIES2134_105780	BAY51827.1	putative transposase
AP018202.2	586705	C	G	31762.8	synonymous_variant	Gly58Gly	LOW	NIES2134_105790	BAY51826.1	putative transposase
AP018202.2	761530	G	A	31793.8	synonymous_variant	His347His	LOW	NIES2134_107530	BAY51655.1	putative transposase
AP018202.2	762085	A	G	32552.8	synonymous_variant	Tyr162Tyr	LOW	NIES2134_107530	BAY51655.1	putative transposase
AP018202.2	881892	G	C	29205.8	missense_variant	His344Gln	MODERATE	NIES2134_108670	BAY51542.1	putative transposase
AP018202.2	882799	C	G	33923.8	missense_variant	Gly42Ala	MODERATE	NIES2134_108670	BAY51542.1	putative transposase
AP018202.2	961077	T	C	22613.8	synonymous_variant	Ala142Ala	LOW	NIES2134_109440	BBA91565.1	hypothetical protein
AP018202.2	961119	T	C	24966.8	synonymous_variant	Ala156Ala	LOW	NIES2134_109440	BBA91565.1	hypothetical protein
AP018202.2	1021688	T	G	42312.8	missense_variant	Lys45Gln	MODERATE	NIES2134_110050	BAY51407.1	putative transposase
AP018202.2	1021689	T	C	42312.8	synonymous_variant	Arg44Arg	LOW	NIES2134_110050	BAY51407.1	putative transposase
AP018202.2	1021728	A	G	27545.8	synonymous_variant	Asn31Asn	LOW	NIES2134_110050	BAY51407.1	putative transposase
AP018202.2	1118408	A	AGGGTAATGAGGC	19012.7	conservative_inframe_insertion	Thr197_Leu198insArgLeuIleThr	MODERATE	NIES2134_111060	BAY51306.1	putative transposase
AP018202.2	1181705	C	A	50740.8	missense_variant	Gln253Lys	MODERATE	NIES2134_111750	BAY51238.1	putative transposase
AP018202.2	1181708	T	C	50996.8	synonymous_variant	Leu254Leu	LOW	NIES2134_111750	BAY51238.1	putative transposase
AP018202.2	1181713	G	A	50663.8	synonymous_variant	Thr255Thr	LOW	NIES2134_111750	BAY51238.1	putative transposase
AP018202.2	1312751	G	A	25661.8	missense_variant	Ala188Thr	MODERATE	NIES2134_112960	BAY51120.1	hypothetical protein
AP018202.2	1313095	C	T	55528.8	synonymous_variant	Asn302Asn	LOW	NIES2134_112960	BAY51120.1	hypothetical protein
AP018202.2	1313098	A	C	55445.8	missense_variant	Arg303Ser	MODERATE	NIES2134_112960	BAY51120.1	hypothetical protein
AP018202.2	1321946	C	T	228.77	missense_variant	Pro174Leu	MODERATE	NIES2134_113080	BAY51108.1	putative transposase
AP018202.2	1324611	T	G	8428.77	missense_variant	Glu44Ala	MODERATE	NIES2134_113110	BAY51105.1	putative transposase
AP018202.2	1325325	G	C	52457.8	missense_variant	Ser178Thr	MODERATE	NIES2134_113120	BAY51104.1	putative transposase
AP018202.2	1325329	T	C	52365.8	synonymous_variant	Asn179Asn	LOW	NIES2134_113120	BAY51104.1	putative transposase
AP018202.2	1325625	A	G	31405.8	missense_variant	Asn278Ser	MODERATE	NIES2134_113120	BAY51104.1	putative transposase
AP018202.2	1431560	G	T	32878.8	missense_variant	Ala8Ser	MODERATE	NIES2134_114020	BAY51016.1	putative transposase
AP018202.2	1431803	G	C	31832.8	missense_variant	Glu89Gln	MODERATE	NIES2134_114020	BAY51016.1	putative transposase
AP018202.2	1431877	G	C	30348.8	synonymous_variant	Arg113Arg	LOW	NIES2134_114020	BAY51016.1	putative transposase
AP018202.2	1431916	T	C	29233.8	synonymous_variant	Gly126Gly	LOW	NIES2134_114020	BAY51016.1	putative transposase
AP018202.2	1432328	T	G	29040.8	missense_variant	Ser264Ala	MODERATE	NIES2134_114020	BAY51016.1	putative transposase
AP018202.2	1455100	G	A	29683.8	synonymous_variant	Ser339Ser	LOW	NIES2134_114220	BAY50996.1	putative transposase
AP018202.2	1455557	C	T	29407.8	missense_variant	Gly187Asp	MODERATE	NIES2134_114220	BAY50996.1	putative transposase
AP018202.2	1455748	C	T	27290.8	synonymous_variant	Arg123Arg	LOW	NIES2134_114220	BAY50996.1	putative transposase
AP018202.2	1556463	A	G	32228.8	missense_variant	Thr195Ala	MODERATE	NIES2134_115230	BAY50897.1	hypothetical protein
AP018202.2	1557057	G	GT	41010.7	intergenic_region		MODIFIER	NIES2134_115230-NIES2134_115240	BAY50897.1	hypothetical protein
AP018202.2	1741354	G	A	30350.8	missense_variant	Thr269Ile	MODERATE	NIES2134_117060	BAY50719.1	hypothetical protein
AP018202.2	1824245	A	AAAGCT	15504.7	frameshift_variant	Phe638fs	HIGH	NIES2134_117830	BAY53134.1	hypothetical protein (EAL domain protein)
AP018202.2	1934402	C	G	11730.8	missense_variant	Asp121Glu	MODERATE	NIES2134_119030	BAY53016.1	putative transposase
AP018202.2	1934447	C	A	14908.8	synonymous_variant	Arg136Arg	LOW	NIES2134_119030	BAY53016.1	putative transposase
AP018202.2	1934642	C	T	14858.8	synonymous_variant	Asn201Asn	LOW	NIES2134_119030	BAY53016.1	putative transposase
AP018202.2	1934921	A	C	17095.8	synonymous_variant	Val294Val	LOW	NIES2134_119030	BAY53016.1	putative transposase
AP018202.2	2045464	CA	C	34541.7	frameshift_variant	Ala131fs	HIGH	NIES2134_120110	BAY52909.1	putative transposase
AP018202.2	2056187	C	T	32893.8	stop_gained	Trp328*	HIGH	NIES2134_120240	BAY52896.1	putative transposase
AP018202.2	2056474	TTGTTTTCTCGCGTCG	T	31808.7	conservative_inframe_deletion	Arg228_Thr232del	MODERATE	NIES2134_120240	BAY52896.1	putative transposase
AP018202.2	2056514	A	C	32531.8	synonymous_variant	Leu219Leu	LOW	NIES2134_120240	BAY52896.1	putative transposase
AP018202.2	2056520	A	G	31935.8	synonymous_variant	Arg217Arg	LOW	NIES2134_120240	BAY52896.1	putative transposase
AP018202.2	2056549	A	G	21656.8	synonymous_variant	Leu208Leu	LOW	NIES2134_120240	BAY52896.1	putative transposase
AP018202.2	2085581	AC	A	31159.7	intergenic_region		MODIFIER	NIES2134_120540-NIES2134_120550
AP018202.2	2126363	G	A	31726.8	synonymous_variant	Asp312Asp	LOW	NIES2134_120960	BAY52824.1	putative transposase
AP018202.2	2126546	C	A	32175.8	missense_variant	Leu251Phe	MODERATE	NIES2134_120960	BAY52824.1	putative transposase
AP018202.2	2126578	T	C	32259.8	missense_variant	Ser241Gly	MODERATE	NIES2134_120960	BAY52824.1	putative transposase
AP018202.2	2127637	A	C	16673.8	synonymous_variant	Pro96Pro	LOW	NIES2134_120970	BAY52823.1	putative transposase
AP018202.2	2127699	C	T	23003.8	missense_variant	Pro117Leu	MODERATE	NIES2134_120970	BAY52823.1	putative transposase
AP018202.2	2163824	GCCTTTGACATACTCACCGC	G	38914.7	intergenic_region		MODIFIER	NIES2134_121310-NIES2134_121320
AP018202.2	2164395	T	C	51659.8	missense_variant	Lys210Arg	MODERATE	NIES2134_121320	BAY52788.1	putative transposase
AP018202.2	2164397	G	A	52065.8	synonymous_variant	Asp209Asp	LOW	NIES2134_121320	BAY52788.1	putative transposase
AP018202.2	2164414	C	A	51383.8	missense_variant	Asp204Tyr	MODERATE	NIES2134_121320	BAY52788.1	putative transposase
AP018202.2	2164723	T	C	30390.8	missense_variant	Ile101Val	MODERATE	NIES2134_121320	BAY52788.1	putative transposase
AP018202.2	2165274	T	C	32694.8	synonymous_variant	Ile57Ile	LOW	NIES2134_121330	BAY52787.1	putative transposase
AP018202.2	2165308	T	C	31275.8	missense_variant	Tyr69His	MODERATE	NIES2134_121330	BAY52787.1	putative transposase
AP018202.2	2190609	T	C	30930.8	intergenic_region		MODIFIER	NIES2134_121600-NIES2134_121610
AP018202.2	2281792	A	C	29346.8	synonymous_variant	Gly187Gly	LOW	NIES2134_122540	BAY52673.1	putative transposase
AP018202.2	2281793	A	C	48063.7	missense_variant	Ile188Leu	MODERATE	NIES2134_122540	BAY52673.1	putative transposase
AP018202.2	2319831	T	G	25931.8	missense_variant	Phe117Leu	MODERATE	NIES2134_122940	BAY52633.1	putative transposase
AP018202.2	2319929	G	C	33738.8	missense_variant	Ser150Thr	MODERATE	NIES2134_122940	BAY52633.1	putative transposase
AP018202.2	2433518	C	G	25183.8	missense_variant	Trp321Ser	MODERATE	NIES2134_123980	BAY52531.1	putative transposase
