# Supplementary material for: Thermosynechococcus switches the direction of phototaxis by a c-di-GMP-dependent process with high spatial resolution
Source: eLife. 2022 May 10;11:e73405. doi: 10.7554/eLife.73405 (PMC9090330; doi:10.7554/eLife.73405)
Supplement: Figure 5—source data 1. [file elife-73405-fig5-data1.xlsx]

## Sheet: Sheet1
	Green
	WT	pilB	pilT	pilA	hfq
Average (μm/min)	31	0	0	0	0
SD	23	3	4	5	3
