# Supplementary material for: Thermosynechococcus switches the direction of phototaxis by a c-di-GMP-dependent process with high spatial resolution
Source: eLife. 2022 May 10;11:e73405. doi: 10.7554/eLife.73405 (PMC9090330; doi:10.7554/eLife.73405)
Supplement: Figure 6—source data 1. [file elife-73405-fig6-data1.xlsx]

## Sheet: Sheet1
	Microcolonies			perpendicular					cell stood up
				cell pole A		cell pole B
time (sec)	x	y		x	y	x	y		x	y
1	182.305	-70.159		93.4798	-44.5828	85.6062	-63.8512		85.9867	-48.6808
2	180.62	-69.921		93.4101	-45.0075	89.8039	-66.4565		84.8279	-50.3918
3	181.813	-70.049		85.4002	-45.9484	87.4158	-67.1056		81.05	-53.436
4	180.656	-70.247		78.6221	-48.3343	85.9559	-68.6437		83.018	-57.244
5	179.873	-70.216		73.431	-49.9522	79.137	-70.6678		78.974	-55.755
6	180.629	-69.853		71.3447	-54.289	78.5093	-73.765		76.609	-53.408
7	183.351	-70.564		63.6268	-58.8965	74.9312	-78.2395		81.8873	-52.4906
8	185.493	-72.194		60.6607	-61.4727	71.5653	-80.3493		88.2992	-51.7825
9	187.028	-75.253		58.2689	-62.9774	68.7591	-82.3006		81.6154	-49.2292
10	187.666	-74.555		60.8103	-61.0568	68.3537	-80.7152		80.7573	-51.2671
11	187.798	-74.335		57.3672	-58.0702	61.9768	-79.1358		75.009	-50.9713
12	184.817	-72.68		57.0128	-60.6865	57.5192	-82.0195		72.3958	-53.3191
13	181.449	-70.476		55.1725	-61.1953	50.1295	-82.8067		74.5766	-54.296
14	181.658	-70.351		51.1529	-62.7858	45.0951	-83.2302		74.573	-56.653
15	181.455	-70.442		56.6985	-65.1419	44.7055	-82.8741		71.9956	-60.1648
16	179.682	-71.399		60.0856	-67.5076	43.5944	-81.7484		73.086	-62.3471
17	177.088	-69.874		59.4529	-67.0867	42.3791	-80.8493		70.1943	-64.4179
18	167.815	-64.694		52.3757	-62.4243	37.4943	-79.0297		62.9699	-59.213
19	162.126	-71.59		44.8243	-62.6262	34.0557	-79.1238		54.962	-53.72
20	153.828	-76.967		43.9052	-61.5915	32.8348	-78.9605		56.2217	-49.0808
21	149.984	-77.179		46.2708	-60.0515	32.2892	-77.6085		53.335	-50.3149
22	144.176	-75.478		45.4764	-57.4183	33.3976	-75.6537		52.1609	-46.9309
23	142.797	-76.106		42.716	-59.0002	26.844	-72.9638		52.8782	-47.7666
24	140.237	-73.945		38.0421	-54.5907	23.2859	-70.0053		58.1837	-51.522
25	138.069	-73.089		34.8508	-49.3803	22.7652	-67.7657		55.1917	-48.523
26	136.259	-74.366		33.4685	-48.3375	17.8975	-63.7145		49.5403	-49.2193
27	134.83	-73.601		30.4149	-45.3933	15.1291	-60.5907		42.363	-47.696
28	131.571	-75.751		27.0754	-44.9153	10.8206	-58.3907		40.2266	-46.0473
29	129.959	-76.403		29.5189	-47.2122	11.3771	-59.6658		42.3145	-45.3106
30	128.829	-79.18							40.7801	-43.7822
31	125.519	-77.031							42.9318	-44.9372
32	120.84	-75.772							39.4423	-43.6756
33	115.787	-71.112							37.0776	-42.5126
34	111.737	-68.406							33.6063	-41.1569
35	109.859	-65.136							33.7538	-43.1505
36	106.917	-61.821							31.6912	-42.6415
37	108.01	-60.71							29.243	-43.489
38	108.139	-61.86							27.489	-47.121
39	106.651	-66.799							23.799	-50.211
40	104.876	-67.746							25.831	-44.405
41	102.223	-69.654							21.9948	-47.0167
42	98.484	-68.564							17.96	-43.777
43	95.083	-67.547							19.157	-43.136
44	90.542	-69.071							16.4	-41.6241
45	87.583	-66.899							21.999	-42.9893
46	85.772	-68.516
47	84.605	-68.26
48	83.339	-72.685
49	81.26	-74.296
50	77.55	-74.319
51	74.675	-77.316
52	75.699	-74.799
53	80.453	-77.73
54	76.964	-78.985
55	75.961	-82.712
56	79.11	-83.114
57	80.06	-84.372
58	77.639	-85.754
59	74.594	-89.531
60	70.008	-87.591
61	68.708	-81.915
62	66.372	-80.831
63	61.567	-80.856
64	58.366	-79.566
65	54.915	-76.542
66	54.289	-71.966
67	50.323	-71.458
68	47.965	-75.847
69	44.85	-77.23
70	42.399	-73.576
71	39.482	-76.714
72	35.275	-79.64
73	31.988	-81.05
74	27.03	-81.44
75	27.76	-75.317
76	31.617	-73.18
