# Supplementary material for: Thermosynechococcus switches the direction of phototaxis by a c-di-GMP-dependent process with high spatial resolution
Source: eLife. 2022 May 10;11:e73405. doi: 10.7554/eLife.73405 (PMC9090330; doi:10.7554/eLife.73405)
Supplement: Figure 6—source data 2. [file elife-73405-fig6-data2.xlsx]

## Sheet: Sheet1
	< 30	30 to 60	> 60		Raw data of cell area (μm)2
Before	36	17	47		3.43396
After	63	24.3333	12.6667		3.43396
					4.46415
					4.80754
					5.15094
					5.15094
					5.83773
					7.21132
					7.89811
					7.89811
					8.2415
					8.5849
					9.27169
					10.3019
					10.3019
					10.6453
					10.6453
					10.9887
					10.9887
					10.9887
					10.9887
					10.9887
					10.9887
					11.3321
					11.3321
					11.3321
					11.3321
					11.6755
					11.6755
					11.6755
					11.6755
					12.0189
					12.0189
					12.3623
					12.3623
					12.3623
					12.3623
					12.3623
					12.3623
					12.3623
					12.3623
					12.7057
					12.7057
					12.7057
					12.7057
					12.7057
					13.049
					13.049
					13.049
					13.3924
					13.3924
					13.3924
					13.3924
					13.3924
					13.3924
					13.3924
					13.3924
					13.7358
					13.7358
					13.7358
					13.7358
					13.7358
					14.0792
					14.0792
					14.0792
					14.0792
					14.0792
					14.0792
					14.0792
					14.0792
					14.0792
					14.0792
					14.0792
					14.0792
					14.4226
					14.4226
					14.4226
					14.4226
					14.4226
					14.4226
					14.4226
					14.4226
					14.4226
					14.4226
					14.4226
					14.4226
					14.766
					14.766
					14.766
					14.766
					14.766
					14.766
					14.766
					14.766
					14.766
					14.766
					14.766
					14.766
					14.766
					15.1094
					15.1094
					15.1094
					15.1094
					15.1094
					15.1094
					15.4528
					15.4528
					15.4528
					15.4528
					15.4528
					15.4528
					15.4528
					15.4528
					15.4528
					15.4528
					15.4528
					15.4528
					15.7962
					15.7962
					15.7962
					15.7962
					16.1396
					16.1396
					16.1396
					16.1396
					16.1396
					16.1396
					16.483
					16.483
					16.483
					16.483
					16.483
					16.483
					16.483
					16.483
					16.483
					16.8264
					16.8264
					16.8264
					16.8264
					16.8264
					16.8264
					16.8264
					16.8264
					16.8264
					16.8264
					16.8264
					17.1698
					17.1698
					17.1698
					17.1698
					17.1698
					17.1698
					17.1698
					17.5132
					17.5132
					17.5132
					17.5132
					17.8566
					17.8566
					17.8566
					17.8566
					17.8566
					17.8566
					18.2
					18.2
					18.2
					18.2
					18.2
					18.2
					18.2
					18.2
					18.2
					18.2
					18.5434
					18.5434
					18.5434
					18.5434
					18.5434
					18.5434
					18.5434
					18.5434
					18.8868
					18.8868
					18.8868
					18.8868
					18.8868
					19.2302
					19.2302
					19.2302
					19.2302
					19.2302
					19.5736
					19.5736
					19.5736
					19.5736
					19.5736
					19.5736
					19.5736
					19.917
					19.917
					19.917
					19.917
					19.917
					19.917
					20.2604
					20.2604
					20.2604
					20.2604
					20.2604
					20.2604
					20.2604
					20.6038
					20.6038
					20.6038
					20.6038
					20.6038
					20.6038
					20.6038
					20.6038
					20.9472
					20.9472
					20.9472
					20.9472
					20.9472
					21.2906
					21.2906
					21.2906
					21.2906
					21.2906
					21.2906
					21.2906
					21.6339
					21.6339
					21.6339
					21.6339
					21.9773
					21.9773
					21.9773
					21.9773
					21.9773
					21.9773
					21.9773
					22.3207
					22.3207
					22.3207
					22.6641
					22.6641
					22.6641
					22.6641
					22.6641
					23.0075
					23.0075
					23.0075
					23.0075
					23.0075
					23.0075
					23.0075
					23.0075
					23.3509
					23.3509
					23.3509
					23.3509
					23.3509
					23.6943
					23.6943
					23.6943
					24.0377
					24.0377
					24.0377
					24.0377
					24.7245
					24.7245
					25.0679
					25.0679
					25.4113
					25.4113
					25.4113
					25.7547
					25.7547
					25.7547
					26.0981
					26.0981
					26.4415
					26.4415
					26.4415
					26.4415
					26.4415
					27.1283
					27.4717
					27.4717
					27.8151
					28.1585
					28.5019
					28.8453
					28.8453
					29.1887
					30.2188
					30.2188
					30.2188
					30.2188
					30.2188
					30.5622
					30.9056
					31.249
					31.5924
					32.2792
					32.6226
					32.6226
					32.6226
					32.966
					32.966
					33.3094
					33.3094
					33.3094
					33.6528
					34.3396
					35.0264
					35.7132
					36.0566
					36.0566
					36.7434
					37.0868
					37.4302
					38.117
					38.4604
					38.4604
					38.8037
					39.8339
					39.8339
					39.8339
					40.5207
					41.2075
					41.5509
					41.8943
					42.9245
					43.2679
					43.6113
					44.2981
					44.9849
					48.0754
					48.0754
					48.4188
					53.9132
					54.6
					58.0339
					58.7207
					59.0641
					66.2754
					72.8
					75.2037
					89.283
					104.736
