# Supplementary material for: Thermosynechococcus switches the direction of phototaxis by a c-di-GMP-dependent process with high spatial resolution
Source: eLife. 2022 May 10;11:e73405. doi: 10.7554/eLife.73405 (PMC9090330; doi:10.7554/eLife.73405)
Supplement: Figure 6—source data 3. [file elife-73405-fig6-data3.xlsx]

## Sheet: Sheet1
	Green +Blue	Green		Raw data of velocity
Velocity (μm/s)	Counts	Counts		Green +Blue	Green
-4	0	0		1.51111	-2.805
-3.8	0	0		-2.49	1.35
-3.6	2	0		-2.57143	-2.685
-3.4	1	5		1.24	-2.58
-3.2	10	18		-1.67308	1.15
-3	38	18		2.025	-2.35
-2.8	36	15		-2.7	-3.11538
-2.6	20	8		-2.9	1.3
-2.4	8	4		1.71429	1.53
-2.2	3	0		1.43	-2.445
-2	5	0		2.0625	-2.4
-1.8	1	0		-2.89286	-2.75
-1.6	1	0		1.33636	0.98
-1.4	0	0		-2.94	1.485
-1.2	0	0		-2.81	-2.91
-1	0	0		-2.70882	-2.8125
-0.8	0	0		1.5	-3.15
-0.6	0	0		1.56818	1.42
-0.4	0	0		1.53	-3.255
-0.2	0	0		-2.895	-2.87143
0	0	0		-3.285	-2.475
0.2	0	0		2.49	1.27
0.4	0	0		-2.71	-3.09
0.6	0	0		1.81	-3.15
0.8	3	1		-2.53235	1.71
1	5	2		-3.48	-2.7
1.2	12	8		-2.8	-2.745
1.4	21	12		-3.045	-2.76
1.6	16	4		-2.72308	1.25769
1.8	7	3		1.785	-2.865
2	8	2		-2.6925	1.9
2.2	1	0		-2.63182	-2.87143
2.4	2	0		-2.6	1.2375
2.6	0	0		1.5375	-3.01875
2.8	0	0		1.182	1.56
3	0	0		1.6125	-3.12
3.2	0	0		2.4125	1.5375
3.4	0	0		1.065	-3
3.6	0	0		-2.445	-2.535
3.8	0	0		1.125	1.65
				-2.76	1.5
				-2.62	-2.63
				-2.79	-2.805
				1.428	1.305
				-2.38	-2.985
				-2.925	-3.16875
				1.77	1.66
				1.71	-2.28
				-2.73	-2.655
				-2.87	-3.18
				-2.77	-2.7875
				1.74	-2.85
				2.12	-2.865
				-2.835	1.5
				-2.685	-3.075
				1.455	1.2675
				1.47	-2.7875
				-2.805	2.07
				-2.55	-2.325
				1.464	-2.8875
				-3.465	1.08
				-1.89	-3.03214
				1.47	-3.025
				-2.7	-2.72
				-1.6	1.52
				-1.8075	1.5375
				-1.98	-3.27
				-2.11071	-3.2375
				-1.85	-2.82
				-2.6175	1.5
				0.9875	-3
				-2.97	1.515
				-2.835	-3.255
				1.275	-3.1375
				-3.1	1.7125
				-2.71154	-2.99
				1.935	-2.85
				-2.56	-2.4
				2.2	-3.11538
				-2.86	-2.325
				-2.80909	-3.195
				1.77353	-2.745
				-2.7	-2.71875
				2.06786	2.175
				-2.59	-2.61923
				-2.91	1.34
				1.9625	-2.51
				-2.7875	-3.15
				1.2975	-2.94
				-2.655	-2.88
				-2.85	1.8375
				-2.9	-3
				-2.49643	-2.52
				-2.675	-2.925
				1.8	1.44
				-2.835	1.93
				1.83	-3.2375
				-2.895	-2.71154
				-3.1	-2.81538
				-2.97	-2.745
				-3.07
				-2.71
				-2.84
				-2.625
				2.11
				-2.275
				1.475
				-2.4
				1.5125
				-2.925
				-2.55
				1.33333
				-2.46
				-2.805
				1.225
				1.70833
				-2.1
				-2.62
				2.19
				-2.565
				-3
				1.2375
				-2.94
				1.56
				1.275
				-3.135
				-1.95
				1.5
				-2.655
				-2.45
				-2.82
				-2.36538
				-2.34643
				1.4625
				-2.65909
				-2.68846
				-2.865
				1.37308
				1.70455
				1.425
				-2.8
				-2.57143
				-2.22857
				-2.28
				1.71
				-2.89615
				-2.78
				-2.93
				1.7625
				-2.74615
				1.6
				-2.715
				-2.6
				1.17
				-2.975
				1.68
				1.27
				-2.895
				1.5
				-2.4
				1.14706
				-2.475
				-2.85
				0.9375
				1.41176
				-2.73
				-2.4
				2.08
				-2.94
				-2.625
				1.82
				-2.955
				-2.7
				1.83
				-2.55
				2.08
				-3.12
				1.62
				-3.165
				1.55
				-2.28
				1.38
				-3.12
				-2.25
				-2.85
				-2.775
				0.852273
				1.61
				-2.835
				-2.46
				1.76786
				-2.475
				-2.805
				-2.745
				1.275
				-3.045
				1.59231
				-2.055
				-2.79
				-2.964
