# Supplementary material for: Thermosynechococcus switches the direction of phototaxis by a c-di-GMP-dependent process with high spatial resolution
Source: eLife. 2022 May 10;11:e73405. doi: 10.7554/eLife.73405 (PMC9090330; doi:10.7554/eLife.73405)
Supplement: Figure 7—source data 1. [file elife-73405-fig7-data1.xlsx]

## Sheet: Figure 6C
	Bead A			Bead B			Bead C			Bead D			Bead E			Bead F			Bead G			Bead H			Bead I			Bead J
	x	y		x	y		x	y		x	y		x	y		x	y		x	y		x	y		x	y		x	y
	24.5236	-12.1951		23.5543	-19.2513		22.5571	-17.5333		18.2714	-17.0744		14.9306	-20.8089		21.344	-20.4051		22.1026	-21.3327		20.0118	-24.4914		18.4097	-28.3533		22.7162	-23.259
	24.8839	-12.4936		23.4125	-18.6518		22.4994	-17.3998		18.1724	-17.0062		15.4074	-20.6716		20.5702	-20.8672		22.0813	-21.5194		19.9642	-24.2106		18.7884	-28.2332		22.9272	-23.4171
	24.8458	-12.8031		23.5498	-18.3972		22.4104	-17.2943		17.5309	-17.8945		15.4915	-20.5045		19.9705	-20.8469		21.9884	-21.6662		20.427	-24.1424		19.163	-28.0681		23.1952	-23.4369
	23.8938	-13.0453		23.5865	-18.2027		22.7469	-17.1527		17.3657	-17.9669		15.8698	-20.8705		19.5906	-20.8153		21.9518	-21.8924		20.6504	-23.9357		19.0689	-27.8472		23.1113	-23.5547
	23.8218	-13.3054		23.581	-18.0395		22.4795	-17.1173		17.2488	-19.0178		16.1916	-20.9992		19.3858	-20.4204		21.9302	-22.0494		20.5987	-23.6442		19.2993	-26.8481		22.535	-23.4586
	23.724	-13.5013		23.2114	-17.9121		22.3735	-17.0086		17.0028	-18.6303		16.7847	-20.6193		19.1981	-20.5302		21.7387	-22.0925		20.8705	-23.4366		18.6717	-26.943		22.7092	-23.5723
	23.6467	-13.7904		23.2249	-17.6714		22.087	-16.9102		17.1093	-18.1835		17.0155	-20.4692		19.0765	-20.2424		21.5139	-22.0629		20.8391	-23.0715		18.5837	-26.5211		22.8105	-23.7205
	23.2355	-14.0786		23.2657	-17.4259		22.6039	-16.6461		17.4636	-17.8405		17.2121	-20.2292		18.9895	-20.3508		21.5023	-22.2205		20.993	-22.8107		18.9103	-26.4122		22.6032	-23.6896
	23.708	-14.4173		23.2149	-17.2583		22.8559	-16.4982		17.7223	-18.8461		17.485	-19.8475		18.8637	-20.1908		21.239	-22.1658		20.8796	-22.3294		19.6801	-26.407		22.2608	-23.6984
	23.8552	-14.7218		23.2997	-16.9612		22.8378	-16.3019		18.1122	-18.1892		17.6612	-19.7715		18.7786	-20.0894		21.2075	-22.3685		21.3231	-22.3249		20.3991	-26.2633		22.8036	-23.8991
	23.872	-15.0024		23.2605	-16.7407		22.2325	-16.2267		18.3309	-17.9558		17.9735	-19.5785		18.7008	-20.2369		21.1012	-22.5013		21.3323	-22.0258		20.5287	-26.0857		22.8215	-23.8808
	23.3037	-15.318		22.9428	-16.5404		22.2054	-16.1024		18.8163	-17.654		18.2788	-20.4018		18.5793	-20.078		20.8349	-22.4189		21.4417	-21.7194		20.2195	-25.6501		22.8457	-23.8505
	22.8607	-15.6238		22.911	-16.3307		21.9338	-16.0146		19.0115	-17.8234		18.6453	-19.8239		18.452	-19.8243		20.6092	-22.4561		21.6526	-21.5153		21.1212	-25.501		22.1031	-23.8127
	22.934	-15.9416		22.9696	-16.1789		21.4295	-16.1374		19.9774	-17.197		18.9977	-20.5403		18.3571	-19.3788		20.4391	-22.5212		21.8872	-21.307		21.1343	-25.2424		22.6198	-23.9777
	23.3471	-16.1829		23.4092	-15.9167		21.8962	-15.8438		20.0803	-17.3609		19.4031	-21.0951		18.1855	-19.5338		20.5096	-22.8063		22.1132	-21.0824		21.6641	-25.1766		22.7595	-23.9754
	23.5894	-16.4599		23.5386	-15.7647		21.7401	-15.8401		20.0189	-17.7432		19.6003	-19.9103		18.0436	-20.947		20.4146	-22.9525		22.3121	-21.3873		21.1206	-24.7762		22.2141	-23.5943
	23.5403	-16.7166		23.5089	-15.5796		21.7303	-15.7634		20.306	-18.0325		19.9047	-19.5344		17.9225	-20.6781		20.1395	-22.816		22.2787	-21.3195		21.3012	-24.3156		22.3483	-23.2617
	23.6236	-17.0307		23.2548	-15.42		22.1915	-15.5826		20.2438	-18.7329		20.2115	-19.7022		17.6474	-20.232		20.2239	-23.1288								22.1307	-23.0009
	23.6655	-17.3222		23.664	-15.2511		22.2432	-15.4521		20.6954	-18.4492		20.4601	-19.6152		17.5892	-21.089		20.4359	-23.5574								22.4463	-22.8504
	23.4297	-17.6562		23.5042	-15.0545		21.9121	-15.428		20.9739	-18.4998		20.8321	-19.6807		17.345	-21.1266		20.4059	-23.6546								22.7073	-22.6561
				23.4362	-14.8516		21.7694	-15.3242		21.3856	-18.633		21.0859	-19.9249		17.126	-20.6657		20.5956	-23.9911								22.7803	-22.3368
				23.1057	-14.7941		21.573	-15.2784		21.507	-18.989		21.4045	-20.217		16.8521	-20.4106		20.4304	-24.0362								22.9064	-22.1526
				23.1062	-14.7916		21.6087	-15.3171					21.6279	-20.1656		16.7422	-19.8205		19.8351	-23.7261								23.0686	-21.9173
				23.2819	-14.7909		21.711	-15.5966								16.6571	-19.4759		19.8108	-23.7445								23.209	-21.5785
				23.5707	-14.6985		21.5233	-16.0232								16.4923	-19.6807		20.0382	-24.2468
				23.5501	-14.6869		21.4851	-16.3833								16.2779	-20.5369		20.0732	-24.4584
				23.5983	-14.7168		21.7746	-16.5526								16.1748	-20.5672		20.2684	-24.6973
				23.6966	-14.7129		21.939	-16.8124								16.0596	-20.3562		19.9886	-24.6955
				23.6717	-14.7737		22.0328	-17.0794								15.9249	-20.6912		20.2729	-25.0274
				23.8092	-14.6165		22.148	-17.331								15.8082	-21.1339		20.394	-25.2313
				23.7342	-14.4607		22.2585	-17.6442								15.8457	-22.0063		20.187	-25.1765
				23.7094	-14.2664		22.3843	-17.9403								15.7553	-21.9519		20.0904	-25.2226
				23.7876	-14.232		22.4943	-18.2628								15.8577	-22.4981		19.6222	-25.0062
				23.6887	-14.1293											15.3984	-21.4492		18.8969	-24.713
				23.859	-14.0717											15.354	-22.1782		18.9126	-24.9823
				24.0094	-14.096											15.2109	-21.9335		18.7796	-25.0512
				23.6746	-14.0443											15.0589	-21.8277		18.3721	-24.9198
				23.7347	-13.8921											15.0305	-21.9502		18.7539	-25.5286
				23.5664	-13.7043														18.5191	-25.5654
				23.7235	-13.5273														18.0095	-25.3518
																			17.7979	-24.9429
																			17.7387	-25.3455
																			18.1408	-25.8199
																			17.917	-25.8232

## Sheet: Figure 6F
	Bead A			Bead B			Bead C			Bead D			Bead E			Bead F			Bead G			Bead H			Bead I			Bead J			Bead K			Bead L			Bead M			Bead N			Bead O			Bead P			Bead Q
	x	y		x	y		x	y		x	y		x	y		x	y		x	y		x	y		x	y		x	y		x	y		x	y		x	y		x	y		x	y		x	y		x
	34.3819	-19.1138		34.3956	-14.5456		30.5139	-15.405		29.2564	-20.5457		29.2564	-20.5457		33.3692	-21.6187		28.542	-20.739		29.9279	-28.9195		22.5377	-27.6883		27.2767	-31.2477		35.7353	-32.3821		33.3799	-30.2642		26.9308	-18.9102		26.6798	-19.4338		30.5623	-19.7134		31.0393	-20		30.5126
	34.3843	-19.0337		33.605	-14.6712		30.9012	-15.3883		29.2571	-20.7271		29.2571	-20.7271		32.7861	-20.6376		27.4554	-20.5873		29.6863	-28.7173		22.9371	-27.9372		27.5479	-30.444		35.7433	-32.3835		33.4436	-30.8026		27.5922	-18.8879		26.8202	-19.4554		30.1288	-20.172		31.0218	-19.7449		30.3774
	34.67	-19.1669		33.5847	-14.8945		31.1513	-15.5699		29.4151	-21.254		29.4151	-21.254		32.4397	-20.5205		27.1268	-20.9396		29.4824	-28.6802		23.1157	-28.4784		27.7475	-30.7659		35.7147	-32.364		33.517	-30.8909		28.2205	-19.1708		26.9606	-19.5175		29.6723	-20.239		30.9503	-20.5362		30.1113
	35.1276	-19.0592		33.6044	-14.9945		31.4777	-15.8846		29.7007	-21.3245		29.7007	-21.3245		32.0356	-20.3395		27.2558	-20.0033		29.303	-28.7763		23.5321	-28.6555		27.9157	-30.4468		35.7144	-32.3823		33.5669	-31.0099		28.7536	-18.9923		27.1152	-19.4999		29.4979	-20.435		31.195	-20.7944		30.1554
	35.3075	-19.4739		33.7045	-15.3158		31.7641	-16.4646		29.7877	-22.1529		29.7877	-22.1529		32.1584	-19.8629		27.3081	-20.2794		29.1716	-28.6714		23.8081	-28.7821		28.0639	-30.6003		35.7227	-32.3841		33.5143	-31.1442		28.4527	-19.3311		27.304	-19.4157		29.2993	-20.3736		30.7531	-20.6282		29.7246
	35.2284	-19.6456		33.6368	-15.6338		32.4056	-16.6178		29.9531	-22.6037		29.9531	-22.6037		31.8291	-19.7286		26.2688	-20.5405		28.9403	-28.8054		24.1191	-28.6633		28.3295	-30.262		35.7235	-32.3991		33.5029	-31.1674		28.6874	-19.0499		27.4439	-19.5155		29.0628	-20.3771		30.576	-19.7998		29.9804
	35.7101	-19.8476		33.4675	-16.2121		33.0333	-16.7953		30.3094	-21.9411		30.3094	-21.9411		31.202	-19.9724		26.0192	-20.2848		28.7471	-28.3915		24.4542	-28.8176		28.6589	-30.7855		35.7343	-32.3962		33.4494	-31.4013		29.0884	-18.8494		27.6328	-19.4947		28.7874	-20.507		30.0176	-19.6395		29.8703
	35.9611	-19.9118		33.1438	-16.3887		32.5568	-16.9994		30.4519	-22.0727		30.4519	-22.0727					25.1988	-20.9275		28.6479	-29.117		24.8099	-28.7906		29.0745	-31.5377		35.7435	-32.381		33.7023	-31.2905		29.2913	-18.9347		27.7987	-19.5381		28.5077	-20.4183		29.6675	-19.9152		29.7825
	35.5039	-20.4147		33.0057	-16.5239		32.2476	-17.3832		30.6345	-21.7059		30.6345	-21.7059					24.9941	-21.1238		28.4164	-28.5468		25.1816	-28.9342		29.2841	-32.3865		35.74	-32.4888		33.7099	-31.5117		29.6535	-18.9257		27.9549	-19.5898		28.2202	-20.3656		29.6791	-19.7812		29.3973
	35.8889	-20.7095		32.5261	-16.6405		31.9275	-17.6053		30.9306	-21.3536		30.9306	-21.3536					25.0562	-21.3102		28.2034	-28.6297		25.4493	-29.1493		29.2588	-31.355		35.7339	-32.386		33.8693	-31.5568		29.9241	-19.0683		28.3206	-19.1878		27.9991	-20.4427		29.5074	-20.0641		29.1011
	35.86	-20.9187		32.481	-16.7924		32.6628	-18.0093		31.1595	-21.449		31.1595	-21.449					25.0839	-22.4962		27.972	-28.9229		25.7517	-28.5307		29.4823	-31.3436		35.7098	-32.3715		33.8357	-31.7705		30.3216	-19.0909		28.5874	-19.3327		27.7263	-20.5985		29.5874	-19.6851		29.1622
	36.0343	-21.2338		32.4038	-17.0957		32.4051	-18.3145		31.4377	-21.5589		31.4377	-21.5589					24.7755	-22.5116		27.7153	-28.6174		26.0354	-28.3359		29.8032	-31.1837		35.1151	-33.0751		34.323	-31.5388		30.6027	-19.0881		28.8616	-19.4744		27.5059	-20.4086		29.3085	-19.4768		29.5401
	36.4305	-21.3636		32.3627	-17.385		32.4097	-18.6325		31.6876	-21.607		31.6876	-21.607					25.125	-22.3033		27.5688	-28.7898		26.2903	-28.3737		30.0306	-31.113		34.6479	-32.9089		34.043	-31.9601					29.1553	-19.6191		27.181	-20.3193		28.9734	-18.9027		29.7731
	36.6489	-21.7268		32.247	-17.6543					31.8992	-21.878		31.8992	-21.878					24.4181	-22.3114		27.3334	-28.9285		26.7038	-28.6625		30.2809	-31.0248		34.4293	-33.0329		33.8808	-32.1873					29.5112	-19.6608		26.9486	-20.3158		29.0443	-18.9013		29.919
	36.602	-21.9798		32.1312	-17.8752					32.2677	-21.4682		32.2677	-21.4682					23.7391	-22.3166		27.124	-28.2224		27.0069	-28.6752		30.4841	-30.8769		34.3492	-33.2563		34.6548	-31.6525					29.7922	-19.6235		26.7624	-20.8514		28.5388	-18.591		29.9986
	36.6657	-22.0783		31.9373	-18.314					32.5052	-21.6419		32.5052	-21.6419					23.687	-21.9386		26.8774	-28.8157		27.1832	-28.0302		30.8021	-30.7346		34.1515	-33.0977		34.8314	-31.4635								26.5679	-20.6636		28.0618	-18.8559		30.4856
	36.6465	-22.0784		31.9111	-18.4629					32.7591	-21.7117		32.7591	-21.7117								26.6783	-28.8124		27.591	-28.4771		31.0995	-30.8018		33.9438	-33.0438		34.2509	-32.1435								26.263	-20.6124		27.1836	-19.3853		30.3655
	36.6429	-22.0727		31.9067	-18.4964					33.0073	-21.7553		33.0073	-21.7553								26.503	-28.9991		27.7943	-27.9637		31.424	-31.0426		33.8886	-33.101		34.2739	-32.2363								26.0459	-20.9058		26.8656	-20.3785
				31.9139	-18.5092					33.2596	-21.802		33.2596	-21.802								26.3746	-29.265		28.1099	-28.1487		31.7556	-30.8838		33.858	-33.3124		34.957	-31.7112								25.971	-21.2098
				31.8956	-18.5088					33.4927	-21.9085		33.4927	-21.9085								26.0856	-28.9371		28.3941	-28.0443		32.0568	-30.7513		33.7987	-33.4436		34.7438	-32.114								25.9752	-21.2101
				32.0315	-18.576					33.6905	-21.9143		33.6905	-21.9143								25.9438	-28.4518		28.694	-27.9918					33.5794	-33.4316		34.8883	-32.1059								25.9651	-21.2091
				32.0378	-18.5538					34.36	-21.8993		34.36	-21.8993								25.7926	-28.1925		29.093	-27.9944					33.211	-33.3372		35.0305	-32.0927								25.9583	-21.293
										34.348	-21.8888		34.348	-21.8888								25.6857	-28.0669		29.4296	-27.8863					33.0555	-33.4936		35.3304	-31.937								26.1425	-21.287
										34.414	-21.7761		34.414	-21.7761								25.4901	-28.4431		29.4646	-27.8946					32.9021	-33.6006		35.419	-31.9098								26.4931	-21.2688
																						25.4906	-27.6201		29.4769	-27.8693					32.5146	-33.275		35.5864	-31.7625								26.7034	-21.0172
																						25.3346	-27.4225		29.6452	-27.8824					32.5361	-33.6272		35.1593	-31.8001								27.0127	-20.8131
																						25.142	-27.466		29.4751	-28.0207					32.1216	-33.2613		34.6562	-31.9444								27.1941	-20.312
																						25.2187	-27.1122		29.3399	-28.0324					31.969	-32.8619		34.1029	-31.988								27.5516	-20.5999
																									29.4281	-28.0091					31.7317	-33.1344		33.8565	-31.6484								27.8321	-20.4424
																									29.5227	-27.9932					31.8518	-33.6498		33.746	-31.3618								28.1576	-20.545
																									29.5869	-27.9669					31.8428	-34.0595		33.7655	-30.8497								28.6281	-20.8651
																									29.7022	-27.446					31.8981	-34.438		33.2608	-30.9144								28.8361	-20.567
																									29.6564	-27.8508					31.8014	-34.4732		33.14	-30.5824								29.1147	-20.3947
																									29.6834	-27.7276					31.1088	-34.0433		32.7685	-30.3917								29.3852	-20.006
																									29.7431	-27.4517					30.9595	-34.2135		32.6805	-30.0595								29.7073	-19.8204
																									29.7372	-27.4429					30.6069	-34.0517		32.6814	-29.4812								30.0595	-19.849
																									29.7367	-27.4401					30.3003	-34.1156		32.2284	-29.3075								30.2617	-19.8066
																															30.1071	-34.2948		32.0963	-29.3304								30.4547	-19.7123
																															29.7434	-34.0979
																															29.3193	-33.7623
																															29.449	-34.0312
																															29.5214	-33.5088
																															29.8561	-33.3862
																															30.0446	-33.1396
																															30.2679	-32.8329
																															30.5725	-32.9782
																															30.9513	-33.2107
																															31.0572	-32.7378
																															31.2424	-32.434
[truncated: 5 more columns]
