# Supplementary material for: Thermosynechococcus switches the direction of phototaxis by a c-di-GMP-dependent process with high spatial resolution
Source: eLife. 2022 May 10;11:e73405. doi: 10.7554/eLife.73405 (PMC9090330; doi:10.7554/eLife.73405)
Supplement: Figure 7—source data 2. [file elife-73405-fig7-data2.xlsx]

## Sheet: Sheet1
Beads 1			Beads 2			Beads 3			Beads 4			Beads 5			Beads 6			Beads 7			Beads 8			Beads 9
t (sec)	displacement (μm)		t (sec)	displacement (μm)		t (sec)	displacement (μm)		t (sec)	displacement (μm)		t (sec)	displacement (μm)		t (sec)	displacement (μm)		t (sec)	displacement (μm)		t (sec)	displacement (μm)		t (sec)	displacement (μm)
14.8	6.19536		16.6	8.47334		22	8.43015		19.8	9.26252		14.2	1.51517		16.9	1.3078		19.2	2.06108		20	3.13226		20.8	2.79393
14.9	6.3155		16.7	7.99351		22.1	8.1919		19.9	8.96092		14.3	1.6367		17	1.89822		19.3	2.84755		20.1	3.27645		20.9	2.9058
15	6.44192		16.8	7.90862		22.2	7.88067		20	8.6298		14.4	1.79957		17.1	2.15802		19.4	3.44236		20.2	3.4028		21	2.89413
15.1	6.56396		16.9	7.53699		22.3	7.52091		20.1	8.48573		14.5	1.97467		17.2	2.35465		19.5	3.81867		20.3	3.45946		21.1	3.01856
15.2	6.33918		17	7.2224		22.4	7.25686		20.2	7.51544		14.6	2.09968		17.3	2.51701		19.6	4.01629		20.4	3.55396		21.2	3.03453
15.3	6.679		17.1	6.61568		22.5	7.05612		20.3	7.95156		14.7	2.26699		17.4	2.64462		19.7	4.20192		20.5	3.68719		21.3	3.10029
15.4	6.72112		17.2	6.38505		22.6	6.76415		20.4	7.6714		14.8	2.41787		17.5	2.88395		19.8	4.33446		20.6	3.86937		21.4	3.22482
15.5	6.52555		17.3	6.19625		22.7	6.47348		20.5	7.38393		14.9	2.52827		17.6	3.12698		19.9	4.41499		20.7	3.98423		21.5	3.23911
15.6	5.92786		17.4	5.95658		22.8	6.14041		20.6	6.93843		15	2.69829		17.7	3.29688		20	4.5505		20.8	4.0882		21.6	3.34814
15.7	5.79085		17.5	5.79134		22.9	5.84599		20.7	6.4535		15.1	2.84851		17.8	3.59017		20.1	4.64428		20.9	4.28516		21.7	3.40175
15.8	5.69435		17.6	5.51276		23	5.56762		20.8	6.23608		15.2	3.01527		17.9	3.81188		20.2	4.70967		21	4.47819		21.8	3.38064
15.9	5.42191		17.7	5.1233		23.1	5.2329		20.9	6.01058		15.3	3.17377		18	4.03561		20.3	4.84376		21.1	4.60519		21.9	3.34673
16	5.16654		17.8	4.80987		23.2	4.95564		21	5.45022		15.4	3.37964		18.1	4.24758		20.4	5.00096		21.2	4.76646		22	3.511
16.1	4.79134		17.9	4.4023		23.3	4.63193		21.1	5.21076		15.5	3.557		18.2	4.39224		20.5	5.1771		21.3	4.83257		22.1	3.51541
16.2	4.60333		18	4.0339		23.4	4.36744		21.2	4.94151		15.6	3.66675		18.3	4.63326		20.6	5.31261		21.4	4.94062		22.2	3.48474
16.3	4.39434		18.1	3.85319		23.5	4.09446		21.3	4.80168		15.7	3.83205		18.4	4.78732		20.7	5.37106		21.5	4.99386		22.3	3.26714
16.4	3.98886		18.2	3.6398		23.6	3.83593		21.4	4.31096		15.8	3.97056		18.5	4.97157		20.8	5.47895		21.6	5.06946		22.4	2.90848
16.5	3.64187		18.3	3.29925		23.7	3.5264					15.9	4.09121		18.6	5.13205		20.9	5.76136		21.7	5.11232		22.5	2.76007
16.6	3.4246		18.4	3.08494		23.8	3.23873					16	4.22263		18.7	5.30547		21	5.83576		21.8	5.2275		22.6	2.4902
16.7	3.17633		18.5	2.71106		23.9	2.894					16.1	4.31311		18.8	5.49651		21.1	6.08243		21.9	5.33373		22.7	2.21714
16.8	2.78078		18.6	2.39699								16.2	4.43914		18.9	5.69854		21.2	6.27506		22	5.47429		22.8	1.89123
16.9	2.45365		18.7	2.02309								16.3	4.57957		19	5.76343		21.3	6.54942		22.1	5.57917		22.9	1.67689
			18.8	1.81336								16.4	4.77451		19.1	5.76585		21.4	6.69764		22.2	5.53103		23	1.40688
												16.5	4.80488		19.2	5.76034		21.5	6.82792		22.3	5.23343		23.1	1.04607
												16.6	4.99684		19.3	5.85398		21.6	6.96217		22.4	4.90041
												16.7	5.13259		19.4	5.86501		21.7	7.12215		22.5	4.58563
												16.8	5.19687		19.5	5.83661		21.8	7.22526		22.6	4.31525
												16.9	5.36868		19.6	5.84468		21.9	7.34293		22.7	4.01302
												17	5.46132		19.7	5.78267		22	7.47648		22.8	3.73017
												17.1	5.56334		19.8	5.94759		22.1	7.61417		22.9	3.45393
												17.2	5.63273		19.9	6.09842		22.2	7.69341		23	3.12196
												17.3	5.72597		20	6.29126		22.3	7.77216		23.1	2.8004
												17.4	5.842		20.1	6.32987		22.4	7.78979		23.2	2.46002
												17.5	6.13259		20.2	6.42718		22.5	8.05198
												17.6	6.30731		20.3	6.4945		22.6	8.2091
												17.7	6.45044		20.4	6.48272		22.7	8.30514
												17.8	6.6615		20.5	6.51146		22.8	8.43837
												17.9	6.80972		20.6	6.66626		22.9	8.48586
												18	6.99842		20.7	6.84769
												18.1	7.2191		20.8	7.03019
												18.2	7.11907
												18.3	7.41936
												18.4	7.44518
												18.5	7.60724
												18.5	7.60724
												18.6	7.38185
												18.7	7.41162
												18.8	7.30431
												18.9	6.96743
												19	6.60148
												19.1	6.30173
												19.2	6.06334
												19.3	5.80973
												19.4	5.49192
												19.4	5.19752
												19.5	5.02042
												19.6	4.66305
												19.7	4.36156
												19.8	4.1739
												19.9	3.83813
												20	3.59391
												20.1	3.30222
												20.2	3.08521
												20.3	2.73204
												20.4	2.54035
												20.5	2.28089
												20.6	1.99633
												20.7	1.69162
												20.8	1.3926
												20.9	1.37281
												21	1.35993
