# Supplementary material for: Thermosynechococcus switches the direction of phototaxis by a c-di-GMP-dependent process with high spatial resolution
Source: eLife. 2022 May 10;11:e73405. doi: 10.7554/eLife.73405 (PMC9090330; doi:10.7554/eLife.73405)
Supplement: Figure 7—source data 4. [file elife-73405-fig7-data4.xlsx]

## Sheet: Sheet1
Angle	Retraction	Extension		Raw data of angle
-180	0	0		-106
-150	0	0		-12
-120	13	9		-93
-90	26	9		-78
-60	15	9		18
-30	32	7		-68
0	13	8		-65
30	1	0		-56.3
60	6	2		-19
90	0	0		-5
120	0	0		69
150	0	0		88
				-85
				-16
				-85
				-69
				63
				-28
				-72
				-15
				-95
				-18
				56
				-28
				-8
				18
				-82
				-65
				-40
				-55
				-5
				-34
				71
				5
				-43
				19
				27
				71
				-27
				-53
				-25
				-61
				17
				-16
				-15
				-44
				-4
				-4
				-51
				-109
				-23
				-34.5
				-82
				28
				29
				-13
				-25
				-30.3
				13
				-70
				4
				-36
				12
				-26
				78
				-15
				-4
				-14
				-95
				9.8
				-34
				-59
				-105
				-85
				-87
				-97
				-89
				-78
				-16
				-21.7
				-78
				-26
				-88
				-98
				-62
				-104
				-104
				-10
				-85
				-48
				-6
				-71
				-14.3
				-52
				-80
				-65
				-85
				-95
				-5
				25
				-6
				-10
				-80
				-112
				-95
				-89
				-29
				-5
				66
				63
				-58
				22
				-111
				19
				9
				16
				-45
				-8
				-77
				-22
				5
				-66
				-95
				-70
				-48
				-76
				-29
				-98
				-98
				-41
				-51
				-29
				-98
				-83
				-52
				-109
				20
				-35
				-46
				-114
				-12
				-95
				-78
				-61
				-48
				21
				-72
				-96
				-71
				11
