# Supplementary material for: Thermosynechococcus switches the direction of phototaxis by a c-di-GMP-dependent process with high spatial resolution
Source: eLife. 2022 May 10;11:e73405. doi: 10.7554/eLife.73405 (PMC9090330; doi:10.7554/eLife.73405)
Supplement: Figure 8—source data 1. [file elife-73405-fig8-data1.xlsx]

## Sheet: Sheet1
velocity
-2.05833
-2.65417
-2.31833
-1.075
1.12273
-1.93088
-2.6
1.56591
-1.91389
-2.21591
2.225
-2.46458
2.08542
1.625
2.36364
-2.275
1.38864
-1.90761
1.51667
-2.015
-1.22353
1.19167
1.079
-1.97031
-1.7
-2.795
-2.38333
1.48281
1.1375
-2.1125
1.3325
-2.22083
1.06364
-1.90357
-1.92679
-1.45
-1.50583
-3.26625
2.25
-3.03333
-2.55357
1.625
-3.7375
2.32917
-2.15
1.625
-2.89545
1.64412
-2.795
2.09219
-3.25
1.74687
1.56591
-2.02647
1.375
1.08333
-1.95
