# Supplementary material for: Thermosynechococcus switches the direction of phototaxis by a c-di-GMP-dependent process with high spatial resolution
Source: eLife. 2022 May 10;11:e73405. doi: 10.7554/eLife.73405 (PMC9090330; doi:10.7554/eLife.73405)
Supplement: Figure 8—source data 2. [file elife-73405-fig8-data2.xlsx]

## Sheet: Sheet1
Angle	Counts		Raw data of angle
-180	0		15.797
-150	10		38.945
-120	25		71.801
-90	29		71.944
-60	28		103.98
-30	13		92.943
0	4		76.977
30	2		-79.197
60	5		62
90	1		83
120	0		107
150	0		40
			-16.699
			125.607
			70.438
			55.812
			40.446
			17.775
			67.011
			99.359
			48.855
			36.42
			65.63
			131.371
			41.001
			64.25
			48.888
			104.139
			-84.898
			49.338
			99.866
			114.745
			25.07
			46.145
			97.876
			38.089
			32.248
			-63.435
			54.544
			59.879
			88.234
			80.903
			-80.662
			76.952
			34.944
			80.665
			124.64
			19.075
			-98.183
			46.608
			60.198
			102.125
			29.745
			67.313
			91.848
			8.13
			11.883
			51.143
			-72.641
			100.948
			42.663
			53.973
			56.352
			69.869
			120.579
			20.3
			92.148
			-23.199
			104.036
			73.485
			50.592
			79.305
			109.628
			127.079
			53.746
			114.775
			85.236
			-5.039
			105.414
			126.907
			-51.442
			90.433
			101.186
			15.204
			147.529
			57.349
			22.1
			124.011
			112.952
			86.548
			62.021
			16.105
			70.191
			105.461
			9.751
			84.091
			65.18
			-38.44
			51.167
			30.964
			80.593
			43.723
			88.68
			-75.28
			-8.596
			96.36
			69.341
			127.486
			56.161
			63.12
			150.939
			2.626
			106.633
			83.66
			114.624
			50.728
			145.67
			95.906
			111.379
			-22
			5
			-66
			-95
			-70
			-48
			-76
			-29
			-98
			-98
			-41
			-51
			-29
			-98
			-83
			-52
			-109
			20
			-35
			-46
			-114
			-12
			-95
			-78
			-61
			-48
			21
			-72
			-96
			-71
			11
